# Supplementary material
Source: Elsevier journal article supplement (https://www.sciencedirect.com/science/article/pii/S0104001420301809)

**BJAN-2019-522 – Supplementary Material**

**Table S1** Characteristics of excluded studies.

| **Nº** | **Author, Year** | **Country** | **Study design** | **Sample size** | **Reason for exclusion** |
| --- | --- | --- | --- | --- | --- |
| 1 | Lee BJ et al., 2007 | South Korea | RCT | 40 | Wrong comparator (supine position) |
| 2 | Rao SL et al., 2008 | United States | RCT | 85 | Wrong comparator (ramping vs. ramping position) |
| 3 | Cattano D et al., 2010 | United States | Prospective cohort study | 51 | Wrong comparator (supine position) |
| 4 | Park SH et al., 2010 | South Korea | RCT | 50 | Wrong intervention (sniffing vs. supine position) |
| 5 | Prakash S et al., 2011 | India | RCT | 550 | Wrong intervention (sniffing vs. supine position) |
| 6 | El-Orbany et al, 2015 | United States | RCT | 167 | Wrong intervention (sniffing vs. supine position) |
| 7 | Kim H et al., 2016 | South Korea | RCT | 18 | Wrong intervention (sniffing vs. supine position) |
| 8 | Khandelwal N et al., 2016 | United States | Retrospective cohort study | 528 | Wrong comparator (supine position) |
| 9 | Kim EH et al, 2016 | South Korea | RCT | 46 | Wrong population (paediatrics) and wrong intervention (video laryngoscopy) |
| 10 | Gudivada KK et al., 2017 | India | RCT | 100 | Wrong intervention (Sniffing vs. Extended sniffing) |
| 11 | Tsan SEH et al., 2019 | Malaysia | RCT | 138 | Wrong intervention (video laryngoscopy) |

RCT, Randomized Controlled Trial.

**Table S2** Characteristics of ongoing studies.

| **Author** | **Country** | **Title** | **Completion date** | **Comparator** | **Sample size** | **ClinicalTrial nº** |
| --- | --- | --- | --- | --- | --- | --- |
| Ahmed Hasanin | Egypt | Modified ramped position for intubation of obese females | 1/3/2019 (completed) | 1. Modified ramped | 54 | NCT03640442 |
| 1. Ramped |

**Table S3** Quality assessment of included non-randomised prospective cohort studies using the Newcastle-Ottawa scale.

| **Author, Year** | **Representative ness of exposed cohort**  **(Max:★)** | **Selection** | | **Outcome of interest not present at startb (Max:★)** | **Comparability** | **Outcome**a | | **Total score (out of 7)** |
| --- | --- | --- | --- | --- | --- | --- | --- | --- |
| **Selection of non-exposed cohort**  **(Max:★)** | **Ascertainment of exposure (Max:★)** | **Comparability of cohorts on basis of design and analysisc(Max:★)** | **Assessment of outcomed (Max:★)** | **Adequacy of follow- up**  **(Max:★)** |
| Lebowitz, 2012 | ★ | ★ | ★ | ★ | ★ | ★ | ★ | 7 |
| Reddy, 2016 | ★ | ★ | ★ | ★ | ★ | ★ | ★ | 7 |
| Nayak, 2019 | ★ | ★ | ★ | ★ | ★ | ★ | ★ | 7 |

a Follow up duration for outcomes (under Outcome Domain) was not included as it was not appropriate in the context of the outcomes of interest.

b Demonstration that outcome of interest was not present at start of study (under Selection Domain) was assessed based on presence of features of difficult intubation in the cohorts, which may be a potential confounder (no features of difficult intubation will be given one star).

c A 1-star scale was used instead of the usual 2-stars because Lebowitz et al and Nayak et al used a crossover design with the same cohort, while Reddy et al had comparable cohort characteristics although not intentionally stratified.

d Assessment of outcome (under Outcome Domain) was assessed by giving one star if outcomes were assessed by assessing records or directly measured.

**Table S4** PRISMA checklist.

| **Section/topic** | **Nº** | **Checklist item** | **Performed** |
| --- | --- | --- | --- |
| **Title** |  | |  |
| Title | 1 | Identify the report as a systematic review, meta-analysis, or both. | Done |
| **Abstract** |  | |  |
| Structured summary | 2 | Provide a structured summary including, as applicable: background; objectives; data sources; study eligibility criteria, participants, and interventions; study appraisal and synthesis methods; results; limitations; conclusions and implications of key findings; systematic review registration number. | Done |
| **Introduction** |  | |  |
| Rationale | 3 | Describe the rationale for the review in the context of what is already known. | Done |
| Objectives | 4 | Provide an explicit statement of questions being addressed with reference to participants, interventions, comparisons, outcomes, and study design (PICOS). | Done |
| **Methods** |  | |  |
| Protocol and registration | 5 | Indicate if a review protocol exists, if and where it can be accessed (e.g., Web address), and, if available, provide registration information including registration number. | Done |
| Eligibility criteria | 6 | Specify study characteristics (e.g., PICOS, length of follow-up) and report characteristics (e.g., years considered, language, publication status) used as criteria for eligibility, giving rationale. | Done |
| Information sources | 7 | Describe all information sources (e.g., databases with dates of coverage, contact with study authors to identify additional studies) in the search and date last searched. | Done |
| Search | 8 | Present full electronic search strategy for at least one database, including any limits used, such that it could be repeated. | Done |
| Study selection | 9 | State the process for selecting studies (i.e., screening, eligibility, included in systematic review, and, if applicable, included in the meta-analysis). | Done |
| Data collection process | 10 | Describe method of data extraction from reports (e.g., piloted forms, independently, in duplicate) and any processes for obtaining and confirming data from investigators. | Done |
| Data items | 11 | List and define all variables for which data were sought (e.g., PICOS, funding sources) and any assumptions and simplifications made. | Done |
| Risk of bias in individual studies | 12 | Describe methods used for assessing risk of bias of individual studies (including specification of whether this was done at the study or outcome level), and how this information is to be used in any data synthesis. | Done |
| Summary measures | 13 | State the principal summary measures (e.g., risk ratio, difference in means). | Done |
| Synthesis of results | 14 | Describe the methods of handling data and combining results of studies, if done, including measures of consistency (e.g., I2) for each meta-analysis. | Done |
| Risk of bias across studies | 15 | Specify any assessment of risk of bias that may affect the cumulative evidence (e.g., publication bias, selective reporting within studies). | Done |
| Additional analyses | 16 | Describe methods of additional analyses (e.g., sensitivity or subgroup analyses, meta-regression), if done, indicating which were pre-specified. | Done |
| **Results** |  | | |
| Study selection | 17 | Give numbers of studies screened, assessed for eligibility, and included in the review, with reasons for exclusions at each stage, ideally with a flow diagram. | Done |
| Study characteristics | 18 | For each study, present characteristics for which data were extracted (e.g., study size, PICOS, follow-up period) and provide the citations. | Done |
| Risk of bias within studies | 19 | Present data on risk of bias of each study and, if available, any outcome level assessment (see item 12). | Done |
| Results of individual studies | 20 | For all outcomes considered (benefits or harms), present, for each study: (a) simple summary data for each intervention group (b) effect estimates and confidence intervals, ideally with a forest plot. | Done |
| Synthesis of results | 21 | Present results of each meta-analysis done, including confidence intervals and measures of consistency. | Done |
| Risk of bias across studies | 22 | Present results of any assessment of risk of bias across studies (see Item 15). | N/A |
| Additional analysis | 23 | Give results of additional analyses, if done (e.g., sensitivity or subgroup analyses, meta-regression [see Item 16]). | Done |
| **Discussion** |  | | |
| Summary of evidence | 24 | Summarize the main findings including the strength of evidence for each main outcome; consider their relevance to key groups (e.g., healthcare providers, users, and policy makers). | Done |
| Limitations | 25 | Discuss limitations at study and outcome level (e.g., risk of bias), and at review-level (e.g., incomplete retrieval of identified research, reporting bias). | Done |
| Conclusions | 26 | Provide a general interpretation of the results in the context of other evidence, and implications for future research. | Done |
| **Funding** |  | | |
| Funding | 27 | Describe sources of funding for the systematic review and other support (e.g., supply of data); role of funders for the systematic review. | Done |

**Figure S1** Subgroup analysis for patients with BMI less than 35 kgm-2 and BMI more than 35 kgm-2, comparing between ramping and sniffing positions. A) Forest plot of incidence of CLG 1/2; B) Forest plot of incidence of CLG 3/4; C) Forest plot of incidence of success at first intubation attempt. Random-effects model used for data analysis. CLG 1/2, Cormack-Lehane Grade 1 or 2; CLG 3/4, Cormack-Lehane Grade 3 or 4; M-H, Mantel-Haenszel.

**Figure S2** Meta-analysis of prospective cohort studies comparing glottic exposure between ramping and sniffing positions. A) Forest plot of incidence of CLG 1/2; B) Forest plot of incidence of CLG 3/4; Random-effects model used for data analysis. CLG 1/2, Cormack-Lehane Grade 1 or 2; CLG 3/4, Cormack-Lehane Grade 3 or 4; M-H, Mantel-Haenszel.

**Figure S3** Meta-analysis of secondary outcomes, comparing between ramping and sniffing positions. A) Forest plot of time required for intubation; B) Forest plot of incidence of usage of ancillary manoeuvres; C) Forest plot of incidence of usage of airway adjuncts/equipment. IV, Inverse Variance; M-H, Mantel-Haenszel.

**Figure S4** Subgroup analysis based on OT patients for secondary outcomes, comparing between ramping and sniffing positions. A) Forest plot of time required for intubation; B) Forest plot of incidence of usage of ancillary manoeuvres. Random-effects model used for data analysis. IV, Inverse Variance; M-H, Mantel-Haenszel.


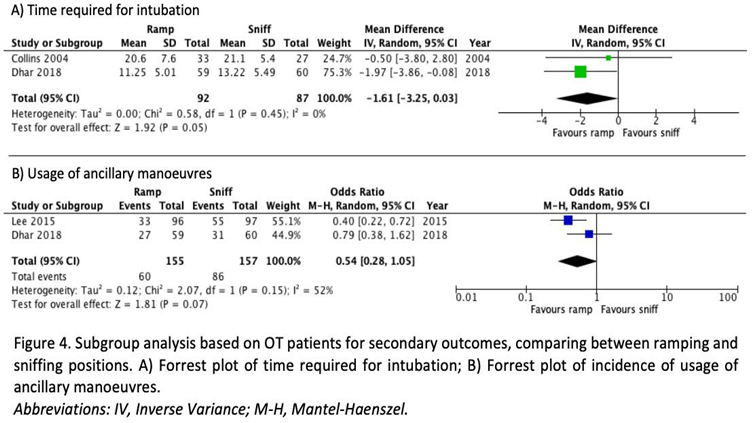

Supplement: mmc1 [file S0104001420301809:mmc1.doc]
